# Supplementary material
Source: publisher figshare collection journal article supplement (https://asha.figshare.com/articles/dataset/_/12276458)
Supplement: Supplementary file 1 [file 1]

## Supplemental Material S2.

### *Correlations Between Vocal Variables*

| Vocal Variables                                                        | 1     | 2     | 3     | 4     | 5     | 6     |
|------------------------------------------------------------------------|-------|-------|-------|-------|-------|-------|
| 1. Number of total vocalizations <sub>HC</sub>                         |       |       |       |       |       |       |
| 2. AQV <sub>A</sub>                                                    | .37** |       |       |       |       |       |
| 3. Number of communication acts with a vocalization <sub>HC</sub>      | .75** | .40** |       |       |       |       |
| 4. Proportion of communicative vocalizations <sub>HC</sub>             | .27*  | .33** | .70** |       |       |       |
| 5. DKCC <sub>HC</sub>                                                  | .75** | .41** | .90** | .67** |       |       |
| 6. Proportion of vocalizations with a canonical syllable <sub>HC</sub> | .56** | .42** | .65** | .53** | .79** |       |
| 7. ACPU-C+V <sub>A</sub>                                               | .05   | .26*  | .17   | .24*  | .18   | .36** |

*Note.* <sub>A</sub> = automated; <sub>HC</sub> = human-coded; ACPU-C+V = average count per utterance – consonants + vowels (Woynaroski et al., 2017; Xu et al., 2014); AQV = automated quantity of vocalizations, which is the number of child vocalizations; DKCC = diversity of key consonants used in communication acts (Wetherby et al., 2007; Woynaroski et al., 2017).

\* $p < .05$ . \*\* $p < .01$ .

## References

- Wetherby, A., Watt, N., Morgan, L., & Shumway, S. (2007). Social communication profiles of children with autism spectrum disorders late in the second year of life. *Journal of Autism and Developmental Disorders*, 37(5), 960–975. <https://doi.org/10.1007/s10803-006-0237-4>
- Woynaroski, T., Oller, D. K., Keceli-Kaysili, B., Xu, D., Richards, J. A., Gilkerson, J., Gray, S., & Yoder, P. (2017). The stability and validity of automated vocal analysis in preverbal preschoolers with autism spectrum disorder. *Autism Research*, 10(3), 508–519. <https://doi.org/10.1002/aur.1667>
- Xu, D., Richards, J. A., & Gilkerson, J. (2014). Automated analysis of child phonetic production using naturalistic recordings. *Journal of Speech, Language, and Hearing Research*, 57(5), 1638–1650. [https://doi.org/10.1044/2014\\_JSLHR-S-13-0037](https://doi.org/10.1044/2014_JSLHR-S-13-0037)
