# Supplementary material
Source: publisher figshare collection journal article supplement (https://asha.figshare.com/articles/dataset/_/12276458)
Supplement: Supplementary file 2 [file 1]

## Supplemental Material S1.

### Descriptive Statistics for Vocal Variables at Time 1

#### *Descriptive Statistics for Human-coded Vocal Variables by Context at Time 1*

|                                                       | CSP      |      |        |          |           | ECI      |      |       |          |           |
|-------------------------------------------------------|----------|------|--------|----------|-----------|----------|------|-------|----------|-----------|
|                                                       | <i>n</i> | Min. | Max.   | <i>M</i> | <i>SD</i> | <i>n</i> | Min. | Max.  | <i>M</i> | <i>SD</i> |
| Number of total vocalizations                         | 75       | 0.00 | 177.00 | 43.44    | 39.40     | 86       | 0.67 | 78.33 | 26.02    | 18.35     |
| Number of communication acts with a vocalization      | 75       | 0.00 | 77.00  | 11.01    | 16.25     | 86       | 0.00 | 50.00 | 7.02     | 8.72      |
| Proportion of communicative vocalizations             | 73       | 0.00 | 0.87   | 0.21     | 0.19      | 86       | 0.00 | 0.79  | 0.24     | 0.19      |
| DKCC                                                  | 75       | 0.00 | 9.00   | 2.68     | 2.77      | 86       | 0.00 | 8.50  | 2.33     | 2.31      |
| Proportion of vocalizations with a canonical syllable | 73       | 0.00 | 0.91   | 0.41     | 0.28      | 86       | 0.00 | 0.91  | 0.42     | 0.28      |

*Note.* CSP = Communication Sample Procedure; DKCC = diversity of key consonants used in communication acts (Wetherby et al., 2007; Woynaroski et al., 2017); ECI = Early Communication Indicator (Greenwood et al., 2006; Luze et al., 2001); Max. = Maximum; Min. = Minimum.

#### *Descriptive Statistics for Automated Vocal Variables at Time 1*

|        | <i>n</i> | Min. | Max. | <i>M</i> | <i>SD</i> |
|--------|----------|------|------|----------|-----------|
| AQV    | 84       | 231  | 3898 | 1618.23  | 896.49    |
| ACPU-C | 84       | 0.96 | 2.97 | 1.78     | 0.41      |
| ACPU-V | 84       | 0.69 | 2.17 | 1.38     | 0.31      |

*Note.* ACPU-C = average count per utterance – consonants (Woynaroski et al., 2017; Xu et al., 2014); ACPU-V = average count per utterance – vowels (Woynaroski et al., 2017; Xu et al., 2014); AQV = automated quantity of vocalizations, which is the number of child vocalizations; Max. = Maximum; Min. = Minimum.

## References

- Greenwood, C. R., Carta, J. J., Walker, D., Hughes, K., & Weathers, M. (2006). Preliminary investigations of the application of the Early Communication Indicator (ECI) for infants and toddlers. *Journal of Early Intervention*, 28(3), 178–196. <https://doi.org/10.1177/105381510602800306>
- Luze, G. J., Linebarger, D. L., Greenwood, C. R., & Carta, J. J. (2001). Developing a general outcome measure of growth in the expressive communication of infants and toddlers. *School Psychology Review*, 30, 383–406.
- Wetherby, A., Watt, N., Morgan, L., & Shumway, S. (2007). Social communication profiles of children with autism spectrum disorders late in the second year of life. *Journal of Autism and Developmental Disorders*, 37(5), 960–975. <https://doi.org/10.1007/s10803-006-0237-4>
- Woynaroski, T., Oller, D. K., Keceli-Kaysili, B., Xu, D., Richards, J. A., Gilkerson, J., Gray, S., & Yoder, P. (2017). The stability and validity of automated vocal analysis in preverbal preschoolers with autism spectrum disorder. *Autism Research*, 10(3), 508–519. <https://doi.org/10.1002/aur.1667>
- Xu, D., Richards, J. A., & Gilkerson, J. (2014). Automated analysis of child phonetic production using naturalistic recordings. *Journal of Speech, Language, and Hearing Research*, 57(5), 1638–1650. [https://doi.org/10.1044/2014\\_JSLHR-S-13-0037](https://doi.org/10.1044/2014_JSLHR-S-13-0037)
