# Supplementary material
Source: publisher figshare collection journal article supplement (https://asha.figshare.com/articles/dataset/_/12276458)
Supplement: Supplementary file 3 [file 1]

### Supplemental Material S3.

#### Growth Curve Model Results

##### *Estimates of Fixed Effects for Empty Model*

| Parameter | Estimate | SE   | df    | t     | p      | Lower CI | Upper CI |
|-----------|----------|------|-------|-------|--------|----------|----------|
| Intercept | -0.66    | 0.07 | 86.48 | -9.80 | < .001 | -0.79    | -0.53    |

##### *Covariance Parameters for Empty Model*

| Parameter | Estimate | SE   | Wald Z | p      | Lower CI | Upper CI |
|-----------|----------|------|--------|--------|----------|----------|
| Residual  | 0.58     | 0.06 | 9.10   | < .001 | 0.47     | 0.72     |
| Intercept | 0.19     | 0.06 | 3.01   | < .01  | 0.10     | 0.36     |

##### *Estimates of Fixed Effects for Random Intercept Fixed Slope Model*

| Parameter | Estimate | SE   | df     | t     | p      | Lower CI | Upper CI |
|-----------|----------|------|--------|-------|--------|----------|----------|
| Intercept | 0.01     | 0.07 | 132.26 | 0.11  | .92    | -0.14    | 0.15     |
| Time      | 0.11     | 0.01 | 167.98 | 20.49 | < .001 | 0.10     | 0.12     |

##### *Covariance Parameters for Random Intercept Fixed Slope Model*

| Parameter | Estimate | SE   | Wald Z | p      | Lower CI | Upper CI |
|-----------|----------|------|--------|--------|----------|----------|
| Residual  | 0.16     | 0.02 | 9.10   | < .001 | 0.13     | 0.20     |
| Intercept | 0.31     | 0.06 | 5.57   | < .001 | 0.22     | 0.45     |

**The following models are random intercept, fixed slope models with one vocal variable as a predictor variable.**

##### *Estimates of Fixed Effects for Model with Number of Total Vocalizations as Predictor Variable*

| Parameter                     | Estimate | SE   | df     | t     | p      | Lower CI | Upper CI |
|-------------------------------|----------|------|--------|-------|--------|----------|----------|
| Intercept                     | 0.21     | 0.09 | 119.83 | 2.36  | .02    | 0.03     | 0.38     |
| Time                          | 0.11     | 0.01 | 167.02 | 20.51 | < .001 | 0.10     | 0.12     |
| Number of total vocalizations | 0.26     | 0.07 | 88.57  | 3.74  | < .001 | 0.12     | 0.40     |

##### *Covariance Parameters for Model with Number of Total Vocalizations as Predictor Variable*

| Parameter | Estimate | SE   | Wald Z | p      | Lower CI | Upper CI |
|-----------|----------|------|--------|--------|----------|----------|
| Residual  | 0.16     | 0.02 | 9.08   | < .001 | 0.13     | 0.20     |
| Intercept | 0.26     | 0.05 | 5.36   | < .001 | 0.18     | 0.38     |

##### *Estimates of Fixed Effects for Model with Automated Quantity of Vocalizations as Predictor Variable*

| Parameter                           | Estimate          | SE                | df     | t     | p      | Lower CI          | Upper CI          |
|-------------------------------------|-------------------|-------------------|--------|-------|--------|-------------------|-------------------|
| Intercept                           | -0.47             | 0.13              | 95.74  | -3.57 | .001   | -0.72             | -0.21             |
| Time                                | 0.11              | 0.01              | 163.29 | 20.23 | < .001 | 0.10              | 0.12              |
| Automated quantity of vocalizations | $2.9 \times 10^4$ | $6.8 \times 10^5$ | 83.89  | 4.25  | < .001 | $1.5 \times 10^4$ | $4.3 \times 10^4$ |

*Covariance Parameters for Model with Automated Quantity of Vocalizations as Predictor Variable*

| Parameter | Estimate | SE   | Wald Z | <i>p</i> | Lower CI | Upper CI |
|-----------|----------|------|--------|----------|----------|----------|
| Residual  | 0.16     | 0.02 | 8.98   | < .001   | 0.13     | 0.20     |
| Intercept | 0.25     | 0.05 | 5.29   | < .001   | 0.18     | 0.37     |

*Estimates of Fixed Effects for Model with Number of Communication Acts with a Vocalization as Predictor Variable*

| Parameter                                        | Estimate | SE   | <i>df</i> | <i>t</i> | <i>p</i> | Lower CI | Upper CI |
|--------------------------------------------------|----------|------|-----------|----------|----------|----------|----------|
| Intercept                                        | 0.63     | 0.09 | 112.58    | 6.82     | < .001   | 0.45     | 0.81     |
| Time                                             | 0.11     | 0.01 | 168.00    | 20.59    | < .001   | 0.10     | 0.12     |
| Number of communication acts with a vocalization | 0.86     | 0.10 | 86.16     | 8.64     | < .001   | 0.66     | 1.05     |

*Covariance Parameters for Model with Number of Communication Acts with a Vocalization as Predictor Variable*

| Parameter | Estimate | SE   | Wald Z | <i>p</i> | Lower CI | Upper CI |
|-----------|----------|------|--------|----------|----------|----------|
| Residual  | 0.16     | 0.02 | 9.09   | < .001   | 0.13     | 0.20     |
| Intercept | 0.14     | 0.03 | 4.62   | < .001   | 0.09     | 0.22     |

*Estimates of Fixed Effects for Model with Proportion of Communicative Vocalizations as Predictor Variable*

| Parameter                                 | Estimate | SE   | <i>df</i> | <i>t</i> | <i>p</i> | Lower CI | Upper CI |
|-------------------------------------------|----------|------|-----------|----------|----------|----------|----------|
| Intercept                                 | 0.56     | 0.08 | 118.55    | 6.84     | < .001   | 0.40     | 0.72     |
| Time                                      | 0.11     | 0.01 | 168.63    | 20.54    | < .001   | 0.10     | 0.12     |
| Proportion of communicative vocalizations | 0.69     | 0.07 | 85.55     | 9.35     | < .001   | 0.55     | 0.84     |

*Covariance Parameters for Model with Proportion of Communicative Vocalizations as Predictor Variable*

| Parameter | Estimate | SE   | Wald Z | <i>p</i> | Lower CI | Upper CI |
|-----------|----------|------|--------|----------|----------|----------|
| Residual  | 0.16     | 0.02 | 9.11   | < .001   | 0.13     | 0.20     |
| Intercept | 0.13     | 0.03 | 4.49   | < .001   | 0.08     | 0.20     |

*Estimates of Fixed Effects for Model with Diversity of Key Consonants Used in Communication Acts as Predictor Variable*

| Parameter | Estimate | SE   | <i>df</i> | <i>t</i> | <i>p</i> | Lower CI | Upper CI |
|-----------|----------|------|-----------|----------|----------|----------|----------|
| Intercept | 0.67     | 0.09 | 115.54    | 7.43     | < .001   | 0.49     | 0.85     |
| Time      | 0.11     | 0.01 | 166.38    | 20.62    | < .001   | 0.10     | 0.12     |
| DKCC      | 0.59     | 0.06 | 85.86     | 9.41     | < .001   | 0.47     | 0.72     |

*Note.* DKCC = diversity of key consonants used in communication acts (Wetherby et al., 2007; Woynaroski et al., 2017).

*Covariance Parameters for Model with Diversity of Key Consonants Used in Communication Acts as Predictor Variable*

| Parameter | Estimate | SE   | Wald Z | p      | Lower CI | Upper CI |
|-----------|----------|------|--------|--------|----------|----------|
| Residual  | 0.17     | 0.02 | 9.05   | < .001 | 0.13     | 0.21     |
| Intercept | 0.13     | 0.03 | 4.35   | < .001 | 0.08     | 0.20     |

*Estimates of Fixed Effects for Model with Proportion of Vocalizations with a Canonical Syllable as Predictor Variable*

| Parameter                                             | Estimate | SE   | df     | t     | p      | Lower CI | Upper CI |
|-------------------------------------------------------|----------|------|--------|-------|--------|----------|----------|
| Intercept                                             | 0.38     | 0.08 | 122.95 | 4.76  | < .001 | 0.22     | 0.54     |
| Time                                                  | 0.11     | 0.01 | 167.90 | 20.55 | < .001 | 0.10     | 0.12     |
| Proportion of vocalizations with a canonical syllable | 0.38     | 0.05 | 86.20  | 7.26  | < .001 | 0.28     | 0.48     |

*Covariance Parameters for Model with Proportion of Vocalizations with a Canonical Syllable as Predictor Variable*

| Parameter | Estimate | SE   | Wald Z | p      | Lower CI | Upper CI |
|-----------|----------|------|--------|--------|----------|----------|
| Residual  | 0.16     | 0.02 | 9.10   | < .001 | 0.13     | 0.20     |
| Intercept | 0.18     | 0.04 | 4.90   | < .001 | 0.12     | 0.26     |

*Estimates of Fixed Effects for Model with ACPU-C+V as Predictor Variable*

| Parameter | Estimate | SE   | df     | t     | p      | Lower CI | Upper CI |
|-----------|----------|------|--------|-------|--------|----------|----------|
| Intercept | 0.19     | 0.10 | 103.79 | 1.93  | .06    | −0.01    | 0.40     |
| Time      | 0.11     | 0.01 | 163.23 | 20.20 | < .001 | 0.10     | 0.12     |
| ACPU-C+V  | 0.27     | 0.10 | 86.50  | 2.71  | < .01  | 0.07     | 0.46     |

*Note.* ACPU-C+V = average count per utterance – consonants + vowels (Woynaroski et al., 2017; Xu et al., 2014).

*Covariance Parameters for Model with ACPU-C+V as Predictor Variable*

| Parameter | Estimate | SE   | Wald Z | p      | Lower CI | Upper CI |
|-----------|----------|------|--------|--------|----------|----------|
| Residual  | 0.16     | 0.02 | 8.98   | < .001 | 0.13     | 0.20     |
| Intercept | 0.29     | 0.05 | 5.43   | < .001 | 0.20     | 0.42     |

*Note.* ACPU-C+V = average count per utterance – consonants + vowels (Woynaroski et al., 2017; Xu et al., 2014).

**The following models are used for the incremental validity analyses. They continue to use a random intercept, fixed slope model but with two vocal variable predictors rather than one.**

*Estimates of Fixed Effects for Model with Number of Total Vocalizations*

| Parameter                     | Estimate | SE   | df     | t     | p      | Lower CI | Upper CI |
|-------------------------------|----------|------|--------|-------|--------|----------|----------|
| Intercept                     | 0.21     | 0.09 | 119.83 | 2.36  | .02    | 0.03     | 0.38     |
| Time                          | 0.11     | 0.01 | 167.02 | 20.51 | < .001 | 0.10     | 0.12     |
| Number of total vocalizations | 0.26     | 0.07 | 88.57  | 3.74  | < .001 | 0.12     | 0.40     |

*Covariance Parameters for Model with Number of Total Vocalizations*

| Parameter | Estimate | SE   | Wald Z | p      | Lower CI | Upper CI |
|-----------|----------|------|--------|--------|----------|----------|
| Residual  | 0.16     | 0.02 | 9.08   | < .001 | 0.13     | 0.20     |
| Intercept | 0.26     | 0.05 | 5.36   | < .001 | 0.18     | 0.38     |

*Estimates of Fixed Effects for Model with Number of Total Vocalizations and Communicative Quality Composite*

| Parameter                       | Estimate | SE   | df     | t     | p      | Lower CI | Upper CI |
|---------------------------------|----------|------|--------|-------|--------|----------|----------|
| Intercept                       | 0.69     | 0.08 | 117.88 | 8.26  | < .001 | 0.53     | 0.86     |
| Time                            | 0.11     | 0.01 | 168.65 | 20.59 | < .001 | 0.10     | 0.12     |
| Number of total vocalizations   | -0.01    | 0.06 | 89.15  | -0.25 | .80    | -0.13    | 0.10     |
| Communicative quality composite | 0.91     | 0.10 | 85.43  | 9.29  | < .001 | 0.72     | 1.11     |

*Covariance Parameters for Model with Number of Total Vocalizations and Communicative Quality Composite*

| Parameter | Estimate | SE   | Wald Z | p      | Lower CI | Upper CI |
|-----------|----------|------|--------|--------|----------|----------|
| Residual  | 0.16     | 0.02 | 9.11   | < .001 | 0.13     | 0.20     |
| Intercept | 0.10     | 0.03 | 4.14   | < .001 | 0.06     | 0.17     |

*Estimates of Fixed Effects for Model with Number of Total Vocalizations and Phonological Quality Composite*

| Parameter                      | Estimate | SE   | df     | t     | p      | Lower CI | Upper CI |
|--------------------------------|----------|------|--------|-------|--------|----------|----------|
| Intercept                      | 0.55     | 0.08 | 121.01 | 6.64  | < .001 | 0.39     | 0.71     |
| Time                           | 0.11     | 0.01 | 167.74 | 20.60 | < .001 | 0.10     | 0.12     |
| Number of total vocalizations  | -0.11    | 0.07 | 87.00  | -1.50 | .14    | -0.25    | 0.04     |
| Phonological quality composite | 0.60     | 0.08 | 84.71  | 7.74  | < .001 | 0.44     | 0.75     |

*Covariance Parameters for Model with Number of Total Vocalizations and Phonological Quality Composite*

| Parameter | Estimate | SE   | Wald Z | p      | Lower CI | Upper CI |
|-----------|----------|------|--------|--------|----------|----------|
| Residual  | 0.16     | 0.02 | 9.09   | < .001 | 0.13     | 0.20     |
| Intercept | 0.13     | 0.03 | 4.49   | < .001 | 0.09     | 0.20     |

*Estimates of Fixed Effects for Model with Number of Total Vocalizations and ACPU-C+V*

| Parameter                     | Estimate | SE   | df     | t     | p      | Lower CI | Upper CI |
|-------------------------------|----------|------|--------|-------|--------|----------|----------|
| Intercept                     | 0.38     | 0.10 | 103.67 | 3.62  | < .001 | 0.17     | 0.59     |
| Time                          | 0.11     | 0.01 | 163.29 | 20.28 | < .001 | 0.10     | 0.12     |
| Number of total vocalizations | 0.27     | 0.07 | 87.07  | 3.93  | < .001 | 0.13     | 0.40     |
| ACPU-C+V                      | 0.24     | 0.09 | 86.67  | 2.69  | < .01  | 0.06     | 0.42     |

*Note.* ACPU-C+V = average count per utterance – consonants + vowels (Woynaroski et al., 2017; Xu et al., 2014).

*Covariance Parameters for Model with Number of Total Vocalizations and ACPU-C+V*

| Parameter | Estimate | SE   | Wald Z | p      | Lower CI | Upper CI |
|-----------|----------|------|--------|--------|----------|----------|
| Residual  | 0.16     | 0.02 | 8.98   | < .001 | 0.13     | 0.20     |
| Intercept | 0.24     | 0.05 | 5.25   | < .001 | 0.17     | 0.35     |

*Note.* ACPU-C+V = average count per utterance – consonants + vowels (Woynaroski et al., 2017; Xu et al., 2014).

*Estimates of Fixed Effects for Model with Automated Quantity of Vocalizations*

| Parameter                           | Estimate          | SE                | df     | t     | p      | Lower CI          | Upper CI          |
|-------------------------------------|-------------------|-------------------|--------|-------|--------|-------------------|-------------------|
| Intercept                           | −0.47             | 0.13              | 95.74  | −3.57 | .001   | −0.72             | −0.21             |
| Time                                | 0.11              | 0.01              | 163.29 | 20.23 | < .001 | 0.10              | 0.12              |
| Automated quantity of vocalizations | $2.9 \times 10^4$ | $6.8 \times 10^5$ | 83.89  | 4.25  | < .001 | $1.5 \times 10^4$ | $4.3 \times 10^4$ |

*Covariance Parameters for Model with Automated Quantity of Vocalizations*

| Parameter | Estimate | SE   | Wald Z | p      | Lower CI | Upper CI |
|-----------|----------|------|--------|--------|----------|----------|
| Residual  | 0.16     | 0.02 | 8.98   | < .001 | 0.13     | 0.20     |
| Intercept | 0.25     | 0.05 | 5.29   | < .001 | 0.18     | 0.37     |

*Estimates of Fixed Effects for Model with Automated Quantity of Vocalizations and Communicative Quality Composite*

| Parameter                           | Estimate          | SE                | df     | t     | p      | Lower CI           | Upper CI          |
|-------------------------------------|-------------------|-------------------|--------|-------|--------|--------------------|-------------------|
| Intercept                           | 0.48              | 0.14              | 94.78  | 3.49  | < .01  | 0.21               | 0.75              |
| Time                                | 0.11              | 0.01              | 164.67 | 20.39 | < .001 | 0.10               | 0.12              |
| Automated quantity of vocalizations | $9.8 \times 10^5$ | $5.2 \times 10^5$ | 83.81  | 1.89  | .06    | $-5.0 \times 10^6$ | $2.0 \times 10^4$ |
| Communicative quality composite     | 0.83              | 0.09              | 83.88  | 9.39  | < .001 | 0.66               | 1.01              |

*Covariance Parameters for Model with Automated Quantity of Vocalizations and Communicative Quality Composite*

| Parameter | Estimate | SE   | Wald Z | p      | Lower CI | Upper CI |
|-----------|----------|------|--------|--------|----------|----------|
| Residual  | 0.16     | 0.02 | 8.99   | < .001 | 0.13     | 0.20     |
| Intercept | 0.10     | 0.02 | 3.99   | < .001 | 0.06     | 0.16     |

***Estimates of Fixed Effects for Model with Automated Quantity of Vocalizations and Phonological Quality Composite***

| Parameter                           | Estimate            | SE                  | df     | t     | p      | Lower CI             | Upper CI            |
|-------------------------------------|---------------------|---------------------|--------|-------|--------|----------------------|---------------------|
| Intercept                           | 0.35                | 0.15                | 94.78  | 2.30  | .02    | 0.05                 | 0.64                |
| Time                                | 0.11                | 0.01                | 163.51 | 20.39 | < .001 | 0.10                 | 0.12                |
| Automated quantity of vocalizations | 9.5×10 <sup>5</sup> | 6.9×10 <sup>5</sup> | 83.77  | 1.62  | .11    | −2.2×10 <sup>5</sup> | 2.1×10 <sup>4</sup> |
| Phonological quality composite      | 0.47                | 0.06                | 85.03  | 7.42  | < .001 | 0.35                 | 0.60                |

***Covariance Parameters for Model with Automated Quantity of Vocalizations and Phonological Quality Composite***

| Parameter | Estimate | SE   | Wald Z | p      | Lower CI | Upper CI |
|-----------|----------|------|--------|--------|----------|----------|
| Residual  | 0.16     | 0.02 | 8.97   | < .001 | 0.13     | 0.20     |
| Intercept | 0.13     | 0.03 | 4.44   | < .001 | 0.08     | 0.20     |

***Estimates of Fixed Effects for Model with Automated Quantity of Vocalizations and ACPU-C+V***

| Parameter                           | Estimate            | SE                  | df     | t     | p      | Lower CI            | Upper CI            |
|-------------------------------------|---------------------|---------------------|--------|-------|--------|---------------------|---------------------|
| Intercept                           | −0.29               | 0.16                | 92.12  | −1.78 | .08    | −0.61               | 0.03                |
| Time                                | 0.11                | 0.01                | 163.45 | 20.21 | < .001 | 0.10                | 0.12                |
| Automated quantity of vocalizations | 2.6×10 <sup>4</sup> | 6.9×10 <sup>5</sup> | 84.41  | 3.69  | < .001 | 1.2×10 <sup>4</sup> | 3.9×10 <sup>4</sup> |
| ACPU-C+V                            | 0.17                | 0.09                | 87.01  | 1.84  | .07    | −0.01               | 0.36                |

Note. ACPU-C+V = average count per utterance – consonants + vowels (Woynaroski et al., 2017; Xu et al., 2014).

***Covariance Parameters for Model with Automated Quantity of Vocalizations and ACPU-C+V***

| Parameter | Estimate | SE   | Wald Z | p      | Lower CI | Upper CI |
|-----------|----------|------|--------|--------|----------|----------|
| Residual  | 0.16     | 0.02 | 8.98   | < .001 | 0.13     | 0.20     |
| Intercept | 0.24     | 0.05 | 5.25   | < .001 | 0.17     | 0.35     |

Note. ACPU-C+V = average count per utterance – consonants + vowels (Woynaroski et al., 2017; Xu et al., 2014).

## References

- Wetherby, A., Watt, N., Morgan, L., & Shumway, S. (2007). Social communication profiles of children with autism spectrum disorders late in the second year of life. *Journal of Autism and Developmental Disorders*, 37(5), 960–975. <https://doi.org/10.1007/s10803-006-0237-4>
- Woynaroski, T., Oller, D. K., Keceli-Kaysili, B., Xu, D., Richards, J. A., Gilkerson, J., Gray, S., & Yoder, P. (2017). The stability and validity of automated vocal analysis in preverbal preschoolers with autism spectrum disorder. *Autism Research*, 10(3), 508–519. <https://doi.org/10.1002/aur.1667>
- Xu, D., Richards, J. A., & Gilkerson, J. (2014). Automated analysis of child phonetic production using naturalistic recordings. *Journal of Speech, Language, and Hearing Research*, 57(5), 1638–1650. [https://doi.org/10.1044/2014\\_JSLHR-S-13-0037](https://doi.org/10.1044/2014_JSLHR-S-13-0037)
